# Supplementary material for: Characterization of Sex with Animals in C&oacute;rdoba, Colombia. An Exploratory Study
Source: Preprints.org preprint supplement (doi:10.20944/preprints201809.0484.v1), 2018-09-25
Supplement: Supplementary file 3 [file supplementary]

## Sheet: Hoja1
n	edad	Grupo de Edad	Grupo de edad 1	nacio en la costa	zona	primeros 15	conoce la prctica del burreo	Ha tenido relaciones sexuales con burras?	a que edad inicio la practica	Edad Inicio agrupada	Edad de mayor frecuencia de práctica	Cada cuánto realizaba esta práctica en el tiempo en que practicó el burreo con mayor frecuencia?	¿Actualmente practica el burreo	Si la respuesta en no, por favor diga qué edad tenía la última vez que burreó	Edad Ultima veza agrupada	¿Considera usted que existe una edad límite para practicar el “burreo”?	Normalmente con quien la practicaba	cuantas persona	Conoce de algún familiar suyo que realizara esta práctica?	razón que lo motivó a realizar esta práctica	realizo la practica con otro tipo de animal	cual?	Existía o existe un líder que organiza los encuentros	Si su respuesta fue afirmativa: ¿Qué características debía o debe tener esa persona?	Usted fue o ha sido instruido por alguien en esta práctica	Si su respuesta es afirmativa: ¿Qué tipo de instrucciones recibía o recibe?	Le gustaría_Hijo_tuviera la práctica	sus padres se enteraron	fue castigado	de que forma	que piensa en estos momentos sobre la practica_Recodificado	Si tiene hijos: ¿Considera que ellos deben realizar la práctica del burreo	Si la respuesta fue afirmativa, ¿con que fin?	1) Si su respuesta fue negativa ¿Castigaría a ese hijo suyo, si lo descubre haciendo esta práctica?	¿Cómo sería el castigo y por qué?	COMO SINTIÓ PRIMERA VEZ QUE LO HIZO	REDEFINIO LA SEXUALIDAD SEXUAL PREFERENCES
3	30	30 - 34	30 - 44	si	pelayo	si	si	no											No		no
4	30	30 - 34	30 - 44	si	pelayo	si	si	no											No		no
5	30	30 - 34	30 - 44	si	pelayo	si	si	no											No		no
1	30	30 - 34	30 - 44	si	pelayo	si	si	si	13	Entre 12 y 14 años	13 y 16	varias al mes	no	14	Entre 14 y 17 años	14	Solo	0	No	iniciativa propia	no	No	no	0	no	No	No	no	no	0	Perjudicial, Pueden contraer enfermedades	no	0	no	No	No me gustó	No, ya sabía que era hombre
2	30	30 - 34	30 - 44	si	pelayo	si	si	si	10	Entre 9 y 11 años	10 y 11	varias al mes	no	16	Entre 14 y 17 años	18	solo	0	si	obligacion o presion	si	vaca	no	0	si	como sedebe tomar a la burra	No	si	no	0	Beneficioso, entrrega experiencia sexual	no	0	no	No	Me sentí bien o muy bien	No, otras respuestas
8	31	30 - 34	30 - 44	si	pelayo	si	si	no											No		no
7	31	30 - 34	30 - 44	si	pelayo	si	si	si	10	Entre 9 y 11 años	10 y 11	varias a la semana	no	15	Entre 14 y 17 años	No	Amigos y familiares	4	si	invitacion de familiares	no	No	si	era el que escojia la burra por que ya sabia …..	no	No	Si, Por experiencia	no	no	0	Beneficioso, entrrega experiencia sexual	si	experiencia		No	Me sentí bien o muy bien	No, ya sabía que era hombre
6	31	30 - 34	30 - 44	No	pelayo	si	si	si	8	Entre 6 y 8 años	8 y 9	varias al mes	no	13	Entre 10 y 13 años	No	Amigos y familiares	2	No	invitacion amigos	no	No	si	era el mayor y con mas experiencia	no	No	Si, Por experiencia	si	no	0	Beneficioso, previene el consumo de drogas y previene el homosexualismo	si	experiencia		No	Me sentí bien o muy bien	No, otras respuestas
34	32	30 - 34	30 - 44	si	pelayo	si	si	si	7	Entre 6 y 8 años	7 y 9	varias a la semana	no	14	Entre 14 y 17 años	No	solo	0	No	iniciativa propia	si	gallinas , pavas , puercas	no	0	no	No	No	no	no	0	Perjudicial, Pueden contraer enfermedades	no	0	no	No	Me sentí bien o muy bien	No, no entregaron razón
9	32	30 - 34	30 - 44	si	pelayo	si	si	si	14	Entre 12 y 14 años	14 y 15	todos los dias	no	17	Entre 14 y 17 años	17	Amigos y familiares	3	si	invitacion amigos y familiares	si	puerca	si	era el que mas sabia	si	como amarrar la burra	Si, Por experiencia	no	no	0	Perjudicial, Pueden contraer enfermedades	no	0	si	reprendiendolo	Me sentí bien o muy bien	Si, Otras respuestas
10	35	35 - 39	30 - 44	si	pelayo	si	si	no											No		no
48	35	35 - 39	30 - 44	si	pelayo	si	si	si	11	Entre 9 y 11 años	11 y 12	varias al mes	no	14	Entre 14 y 17 años	No	Solo	0	No	iniciativa propia	no	No	no	0	no	No	No	no	no	0	Perjudicial, Pueden contraer enfermedades	no	0	no	No	Me sentí bien o muy bien	No, no entregaron razón
11	35	35 - 39	30 - 44	si	pelayo	si	si	si	12	Entre 12 y 14 años	12 y 13	varias al mes	no	13	Entre 10 y 13 años	13	Amigos y familiares	5	si	invitacion amigos y familiares	no	No	si	que ya tenia experiencia burreado , burrero viejo	no	No	No	si	no	0	Perjudicial, Pueden contraer enfermedades	no	0	no	No	Me sentí bien o muy bien	Si, uno se siente ya un hombre
37	36	35 - 39	30 - 44	si	pelayo	si	si	no											No		no
47	36	35 - 39	30 - 44	si	pelayo	si	si	no											No		no
12	36	35 - 39	30 - 44	si	pelayo	si	si	si	10	Entre 9 y 11 años	10 y 11	varias a la semana	no	15	Entre 14 y 17 años	No	Solo	0	No	iniciativa propia	no	No	no	0	no	No	No	no	no	0	Perjudicial, Pueden contraer enfermedades	no	0	no	reprendiendolo	Me sentí bien o muy bien	No, no entregaron razón
41	36	35 - 39	30 - 44	si	sabana nueva	si	si	si	6	Entre 6 y 8 años	6 y 7	todos los dias	no	20	Entre 18 y 20 años	No	Amigos y familiares	4	si	invitacion amigos y familiares	si	yegua,marrana, gallinas	si	el mas arriesgado y era el mas malo	no	No	Si, Por experiencia	si	si	m edieron una fuetera por q m abuela encontro una gallina muerta por q entre mis prim y yo la maltratamos y no agunto y se murio	Beneficioso, previene el consumo de drogas y previene el homosexualismo	si	para q tenga experiencia y algo q contar asus nietos	0	No	Me sentí bien o muy bien	No, otras respuestas
14	38	35 - 39	30 - 44	si	caño viejo sanpelayo	si	si	si	8	Entre 6 y 8 años	8 y 10	varias a la semana	no	16	Entre 14 y 17 años	No	Solo	0	si	iniciativa propia	no	No	no	0	no	No	Si, Por experiencia	si	no	0	Beneficioso, entrrega experiencia sexual	si	para que conozcan y aprendan , experienc		No	Me sentí bien o muy bien	Si, uno se siente ya un hombre
43	38	35 - 39	30 - 44	si	pelayo	si	si	si	9	Entre 9 y 11 años	9 y 10	varias al mes	no	10	Entre 10 y 13 años	No	Solo	0	No	iniciativa propia	si	marranos	no	0	no	No	No	no	no	0	Perjudicial, Pueden contraer enfermedades	no	0	no	No	Me sentí bien o muy bien	No, no entregaron razón
15	38	35 - 39	30 - 44	si	montelibano	si	si	si	8	Entre 6 y 8 años	8 y 9	todos los dias	no	30	A los 30 años	No	Amigos y familiares	4	si	iniciativa propia	si	mulas , yeguas, terneras	no	0	no	No	Si, Por experiencia	si	no	0	Beneficioso, entrrega experiencia sexual	si	par experimentar la sexualidad		No	Me sentí bien o muy bien	No, no entregaron razón
16	39	35 - 39	30 - 44	si	pelayo	si	si	no											No		no
38	39	35 - 39	30 - 44	si	pelayo	si	si	si	12	Entre 12 y 14 años	12 y 13	varias al mes	no	16	Entre 14 y 17 años	18	Solo	0	No	iniciativa propia	no	No	no	0	no	No	No	no	no	0	Perjudicial, Pueden contraer enfermedades	no	0	no	No	Me sentí bien o muy bien	No, no entregaron razón
40	39	35 - 39	30 - 44	si	pelayo	si	si	si	13	Entre 12 y 14 años	13 y 14	varias al mes	no	16	Entre 14 y 17 años	No	Solo	0	No	iniciativa propia	no	No	no	0	no	No	No	no	no	0	Perjudicial, Pueden contraer enfermedades	no	0	no	No	Me sentí bien o muy bien	No, no entregaron razón
17	40	40 - 44	30 - 44	si	carrillo	si	si	no											No		no
39	40	40 - 44	30 - 44	si	pelayo	si	si	no													no
44	40	40 - 44	30 - 44	si	sabana nueva	si	si	no											si		si
46	40	40 - 44	30 - 44	si	pelayo	si	si	si	9	Entre 9 y 11 años	9 y 10	todos los dias	no	20	Entre 18 y 20 años	No	Amigos y familiares	6	si	invitacion amigos y familiares	si	yegua, marrana	si	q tuviera experiencia en la practica	si	como llegarle a la burray buscar algo disponible para montarse y alcanzarla	No	si	si	mi mama me quito la bicicleta y no me dejo salir por un mes de la casa	Perjudicial, Pueden contraer enfermedades	no	0	no	No	Asustado, tuve problemas	No, otras respuestas
18	41	40 - 44	30 - 44	si	pelayo	si	si	si	13	Entre 12 y 14 años	13 y 14	varias al mes	no	14	Entre 14 y 17 años	No	Amigos y familiares	3	si	iniciativa propia	no	No	no	0	no	No	No	si	no	0	Perjudicial, Pueden contraer enfermedades	no	0	no	No	Me sentí bien o muy bien	No, otras respuestas
19	42	40 - 44	30 - 44	si	pelayo	si	si	si	11	Entre 9 y 11 años	11 y 12	varias al mes	no	12	Entre 10 y 13 años	15	Amigos y familiares	3	si	iniciativa propia	no	0	no	0	no	No	No	no	no	0	Perjudicial, Pueden contraer enfermedades	no	0	no	No	No me gustó	Si, uno se siente ya un hombre
20	48	45 - 49	45 - 59	si	el caño sn pelayo	si	si	si	10	Entre 9 y 11 años	10 y 11	varias a la semana	no	15	Entre 14 y 17 años	15 y 16	Amigos y familiares	5	si	invitacion amigos	si	gallinas,terneras, puercas	si	nada simplemete que convidava y q ya tenia experiencia	si	como amarrar la burra para q n se fuera , sobrala con un palo …	No	si	no	0	Perjudicial, Pueden contraer enfermedades	no	0	no	no los castigaria pero les haria saber q eso no esbueno	Me sentí bien o muy bien	Si, uno se siente ya un hombre
21	49	45 - 49	45 - 59	si	pelayo	si	si	si	9	Entre 9 y 11 años	9 y 10	varias al mes	no	18	Entre 18 y 20 años	18	Solo	0	si	iniciativa propia	si	yegua , puerca	no	0	no	No	No	no	no	0	Perjudicial, Pueden contraer enfermedades	no	0	si	reprendiendolo	Asustado, tuve problemas	No, no entregaron razón
22	49	45 - 49	45 - 59	si	el bongo pelayo	si	si	si	9	Entre 9 y 11 años	9 y 10	varias a la semana	no	17	Entre 14 y 17 años	No	Amigos y familiares	5	si	invitacion amigos y familiares	no	No	si	era el q sabia como hecer y era mayor q yo y ya tenia experirncia	si	q se debia amarrara y amasar a la burra y sobarla y colocar algo para lacanzarla	Si, Por experiencia	si	no	0	Beneficioso, previene el consumo de drogas y previene el homosexualismo	si	para q aprenda y eso hace parate de la cultura	0	No	Me sentí bien o muy bien	Si, uno se siente ya un hombre
42	50	50 - 54	45 - 59	si	pelayo	si	si	no											No
24	50	50 - 54	45 - 59	si	sabana nueva	si	si	si	8	Entre 6 y 8 años	8 y 9	varias a la semana	no	16	Entre 14 y 17 años	18	Amigos y familiares	4	No	invitacion amigos	no	No	no	0	no	No	Si, Por experiencia	si	no	0	Beneficioso, entrrega experiencia sexual	no	0	no	No	Me sentí bien o muy bien	No, no entregaron razón
23	50	50 - 54	45 - 59	si	pelayo	si	si	si	10	Entre 9 y 11 años	10 y 11	todos los dias	no	17	Entre 14 y 17 años	18	Amigos y familiares	5	si	invitacion amigos y familiares	si	yegua, ternera , puercas	si	era el mayor y con mas experiencia	si	como debia tratar la burra y si no alcansava colocar un bloque o algo para lacansar	No	si	no	0	Perjudicial, Pueden contraer enfermedades	no	0	no	No	Me sentí bien o muy bien	No, ya sabía que era hombre
25	51	50 - 54	45 - 59	si	el caño sn pelayo	si	si	si	10	Entre 9 y 11 años	10 y 11	varias a la semana	no	18	Entre 18 y 20 años	17 y 18	Amigos y familiares	4	si	invitacion amigos y familiares	si	terneras, gallinas	si	un primo q era el mas grande y nos convidabe y ya sabia como hecer	si	sobar a la burra para q no se ariscara y luego irse por detrás y si no alcansaba montarse en una pedra para poder pentrarala y dele q dele	No	si	no	0		no	0	no	le diria que eso no es nada importante y q dedique el tiempo en otra cosa	Me sentí bien o muy bien	No, no entregaron razón
26	53	50 - 54	45 - 59	si	pelayo	si	si	si	10	Entre 9 y 11 años	10 y 11	varias al mes	no	11	Entre 10 y 13 años	No	Amigos y familiares	3	si	invitacion amigos	no	No	si	ya era viejo de comer burras	no	No	Si, Por experiencia	no	no	0	Beneficioso, previene el consumo de drogas y previene el homosexualismo	si	para q aprendan y no hagan otras cosas	0	No	Me sentí bien o muy bien	No, no entregaron razón
27	54	50 - 54	45 - 59	si	pelayito	si	si	si	8	Entre 6 y 8 años	8 y 9	todos los dias	no	20	Entre 18 y 20 años	No	Amigos y familiares	0	si	invitacion de familiares	si	marranos	no	0	no	No	Si, Por experiencia	si	si	me dieron un palra por q rengue una puerca	Beneficioso, entrrega experiencia sexual	si	para q experimenten de todo un poco	0	No	Me sentí bien o muy bien	Si, Otras respuestas
28	55	55 - 59	45 - 59	si	pelayo	si	si	si	8	Entre 6 y 8 años	8 y 9	varias al mes	no	15	Entre 14 y 17 años	15 y 16	Amigos y familiares	4	si	invitacion de familiares	no	No	si	era el q mas havia cojido burras	si	como amarrarla y q no fuera a patear	No	no	no	0	Perjudicial, Pueden contraer enfermedades	no	0	no	No	Me sentí bien o muy bien	No, no entregaron razón
29	56	55 - 59	45 - 59	si	cerete	si	si	no											No		no
30	56	55 - 59	45 - 59	si	pelayo	si	si	si	8	Entre 6 y 8 años	8y9	varias a la semana	no	16	Entre 14 y 17 años	16	Amigos y familiares	8	si	invitacion amigos y familiares	no	No	si	el q tenia experiencia en la practica	si	q havia q marrarla y q no fuera a patear	Si, Por experiencia	si	no	0	Perjudicial, Pueden contraer enfermedades	si	para q tenga experiencia	0	No	Me sentí bien o muy bien	Si, Otras respuestas
31	56	55 - 59	45 - 59	si	sabana nueva	si	si	si	8	Entre 6 y 8 años	8 y 9	varias a la semana	no	19	Entre 18 y 20 años	No	Amigos y familiares	5	si	invitacion amigos y familiares	si	gallinas , puercas , yeguas	si	tenia experiencia y era el mAYOR	si	como amarrara ala burra y sobrla	No	no	no	0	Perjudicial, Pueden contraer enfermedades	no	0	no	No	Me sentí bien o muy bien	Si, uno se siente ya un hombre
32	58	55 - 59	45 - 59	si	pelayo	si	si	si	10	Entre 9 y 11 años	10 y 11	varias a la semana	no	18	Entre 18 y 20 años	No	Amigos y familiares	5	No	invitacion amigos	no	No	no	0	no	No	Si, Por experiencia	si	no	0	Beneficioso, previene el consumo de drogas y previene el homosexualismo	si	para que adquieran experiencia	0	No	Me sentí bien o muy bien	No, no entregaron razón
33	59	55 - 59	45 - 59	si	pelayo	si	si	si	8	Entre 6 y 8 años	8 y 9	varias a la semana	no	20	Entre 18 y 20 años	No	Solo	0	No	iniciativa propia	si	ternera	no	0	no	No	No	no	no	0	Perjudicial, Pueden contraer enfermedades	no	0	no	No	Me sentí bien o muy bien	Si, uno se siente ya un hombre
35	59	55 - 59	45 - 59	si	pelayo	si	si	si	10	Entre 9 y 11 años	10 y 11	todos los dias	no	30	A los 30 años	No	Amigos y familiares	3	si	invitacion amigos	si	gallinas , cerdos,yegua ternera , pava	si	el que convidava	si	como coger la burra para que no pateara	No	no	no	0	Perjudicial, Pueden contraer enfermedades	no	0	no	No	Me sentí bien o muy bien	Si, uno se siente ya un hombre
45	35	35 - 39	30 - 44	si	monteria	si	si	no											No
13	36	35 - 39	30 - 44	si	monteria	si	si	no											No		no
